# Supplementary material
Source: Springer Nature journal article supplement (https://www.springermedizin.de/resource/supplementary/12889_2004_276_MOESM1_ESM.pdf/9500510)
Supplement: MOESM1 [file 9500510]

Including, but not limited to the following:

1. What is your opinion of HIV/AIDS in Trinidad and Tobago?
2. What do you think are the most important factors contributing to HIV/AIDS transmission in Trinidad and Tobago?
3. In your opinion, is HIV/AIDS a problem?
4. Do you think that the myths and misconceptions surrounding HIV are related to religious beliefs?
5. What do you think about homosexuality?
6. What does your religion/organization offer people living with HIV/AIDS?
7. What is your opinion of condom use?
8. What is your opinion of Carnival and HIV/AIDS?
9. Is there a need for your organization to coordinate an HIV/AIDS initiative?
10. Describe any personal experiences with people living with HIV/AIDS.
